# Supplementary material for: Understanding Explosive Sensitivity with Effective Trigger Linkage Kinetics
Source: PubMed Central journal article supplement — ACS Phys Chem Au. 2022 Jun 24;2(5):448–58. doi: 10.1021/acsphyschemau.2c00022 (PMC9955191; doi:10.1021/acsphyschemau.2c00022), 2022-06-24
Supplement: pg2c00022_si_001.pdf [file pg2c00022_si_001.pdf]

**Supplementary Material**  
**Understanding explosive sensitivity with effective trigger linkage kinetics**

Marc J. Cawkwell\*, Jack Davis, Nicholas Lease, Frank W. Marrs, Alexandra Burch,  
Suyana Ferreira, and Virginia W. Manner

Los Alamos National Laboratory, Los Alamos, New Mexico 87545, United States.

\*Email: cawkwell@lanl.gov

**1. Correlations between  $H_{50}$  and Arrhenius rate pre-factors and activation energies.**

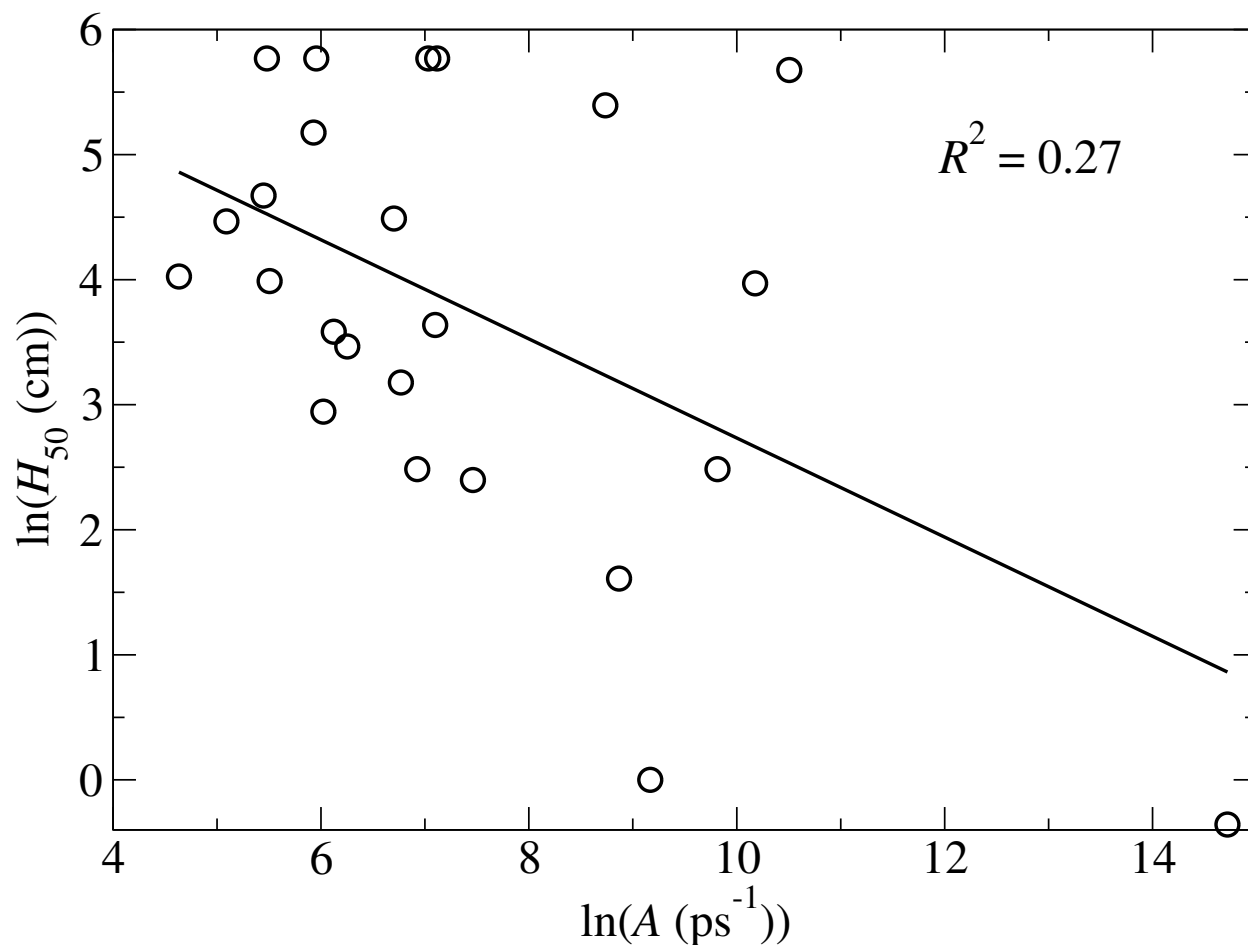

**Figure S1:** Dependence of  $\ln(H_{50})$  on  $\ln(A)$  obtained from the rates of trigger linkage rupture. The solid line represents the linear regression to the data.

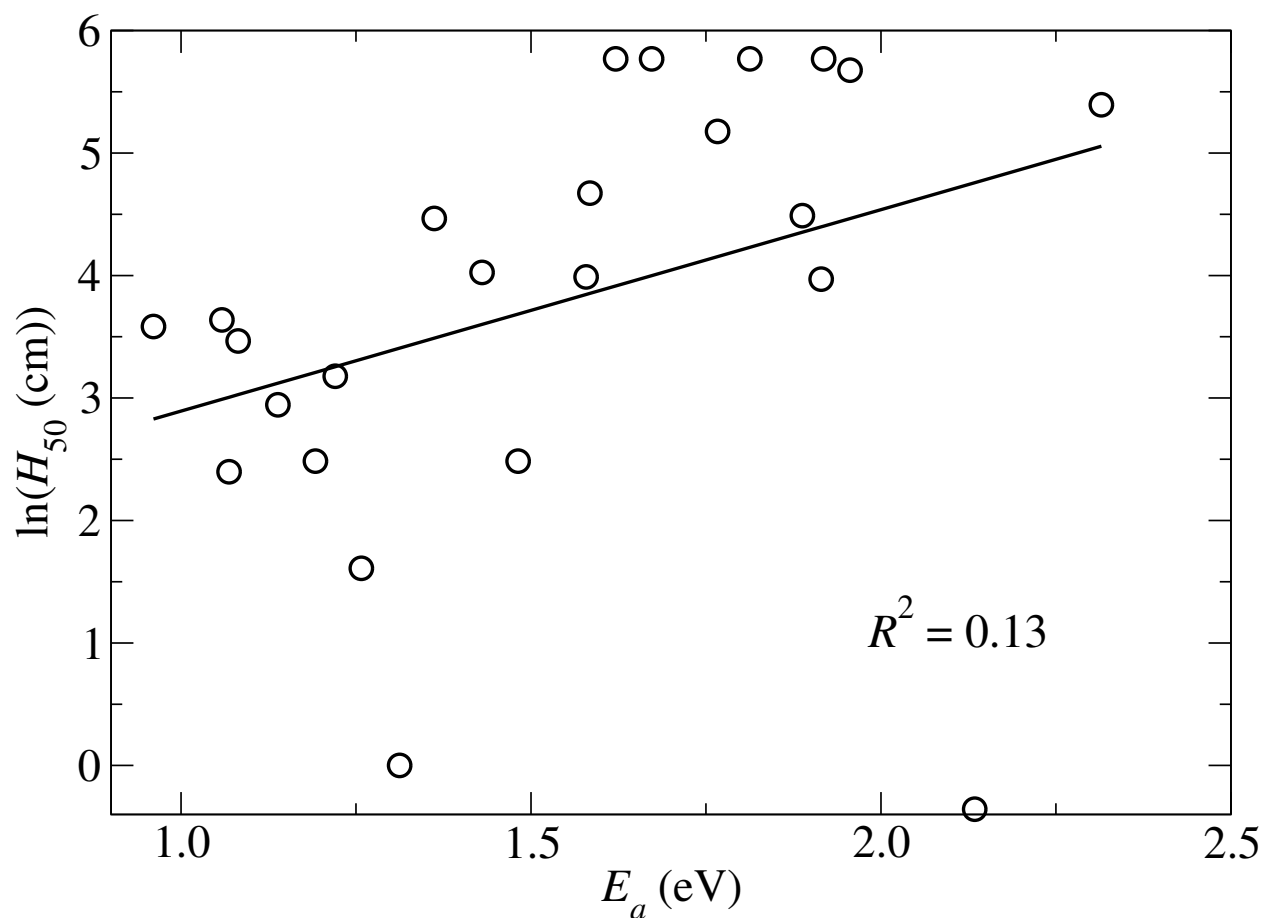

**Figure S2:** Dependence of  $\ln(H_{50})$  on the activation enthalpy,  $E_a$ , obtained from the rates of trigger linkage rupture. The solid line represents the linear regression to the data.

## 2. Comparison of drop weight impact sensitivities

**Table S1.** The drop weight impact sensitivities calculated from the model (Eq. 14,  $R^2 = 0.71$ ) and experimental data.

| Molecule             | Model $H_{50}$ (cm) | Experiment $H_{50}$ (cm) |
|----------------------|---------------------|--------------------------|
| DAAF                 | 23                  | 292                      |
| ETN                  | 6                   | 5                        |
| HMX                  | 19                  | 32                       |
| NQ                   | 129                 | 320                      |
| PETN                 | 7                   | 12                       |
| PETNCH               | 20                  | 24                       |
| PETNCMe              | 27                  | 12                       |
| PETNCNH <sub>2</sub> | 16                  | 36                       |
| RDX                  | 26                  | 19                       |
| TATB                 | 184                 | 320                      |
| TNA                  | 234                 | 177                      |

|             |     |     |
|-------------|-----|-----|
| ETNA        | 31  | 53  |
| Tetryl      | 17  | 38  |
| 2,3,4-TNT   | 137 | 56  |
| 3,4,5-TNT   | 138 | 107 |
| 2,4,6-TNT   | 203 | 220 |
| DATB        | 220 | 320 |
| Picric acid | 162 | 87  |
| LETN        | 6   | 1   |
| ETA         | 3   | 0.7 |
| CL-20       | 6   | 11  |
| HNS         | 158 | 54  |
| DNAN        | 203 | 320 |
| TNBAL       | 245 | 89  |

### 3. Synthesis and drop weight testing of TNBAL

The value of the drop weight impact sensitivity of trinitrobenzene aldehyde (TNBAL) reported by Kamlet and Adolph [1] was found to be unexpectedly small,  $H_{50} = 36$  cm, based on the trigger linkage hypothesis developed in our manuscript. A new TNBAL sample was synthesized at LANL to reevaluate the published impact sensitivity. Drop weight impact testing (Type 12 tool, 2.5 kg mass) performed at LANL on the new TNBAL samples gave  $H_{50} = 89$  cm.

TNBAL was synthesized according to a two-step modified literature procedure [2, 3]. Recrystallized trinitrotoluene (TNT) (1500mg) and N,N-dimethyl-p-nitrosoaniline (1091mg) were suspended in 2.25 mL of pyridine. A few (10-15) crystals of  $I_2$  were added and the suspension was stirred for 7 days at room temperature. The black solution was filtered, washed with cold acetone and dried to yield 1.8g of black solid (76% yield). The black solid (744 mg) was then suspended in 6 mL of concentrated HCl and stirred for 3 hours at 60°C. The resulting red/black suspension was filtered, washed first with cold deionized water, then with a 1:1 mixture of dichloromethane/hexane and dried under vacuum to yield 520 mg of black, crystalline TNBAL.  $^1H$  NMR ( $CDCl_3$ , 400MHz):  $\delta$  10.64 (s, 1H, CHO),  $\delta$  9.30 (s, 2H, Aryl) DSC:

Impact testing was performed with LANL type 12 drop hammer equipment using a 2.5 kg weight according to literature methods [4, 5]. IS: 89 cm<sup>-1</sup>, 21.8 J.

### References

- [1] M. J. Kamlet and H. G. Adolph, Relationship of impact sensitivity with structure of organic high explosives 2. Polynitroaromatic explosives, *Propellants and Explosives*, **1979**, 4, 30-34.
- [2] B. Wu, H. Yang, Z. Wang, Q. Lin, C. Ju and G. Cheng, Synthesis and characterization of new energetic derivatives containing a high nitrogen content moiety and picryl group: a new strategy for incorporating the picryl functionality, *RSC Advances*, **2014**, 4, 53282-53290.
- [3] D. E. Dosch, M. Reichel, M. Born, T. M. Klapotke and J. Karaghiosoff, Investigation of Structure–Property Relationships of Three Nitroaromatic Compounds: 1-Fluoro-2,4,6-

- trinitrobenzene, 2,4,6-Trinitrophenyl Methanesulfonate, and 2,4,6-Trinitrobenzaldehyde, *Cryst. Growth Des.*, **2021**, *21*, 243-248.
- [4] G. W. Brown, M. M. Sandstrom, D. N. Preston, C. J. Pollard, K. F. Warner, D. N. Sorensen, D. L. Remmers, J. J. Phillips, T. J. Shelley, J. A. Reyes, P. C. Hsu and J. G. Reynolds, Statistical Analysis of an Inter-Laboratory Comparison of Small-Scale Safety and Thermal Testing of RDX, *Propellants Explos. Pyrotech.*, **2015**, *40*, 221-232.
- [5] F. W. Marrs, V. W. Manner, A. C. Burch, J. D. Yeager, G. W. Brown, L. M. Kay, R. T. Buckley, C. M. Anderson-Cook and M. J. Cawkwell, Sources of variation in drop-weight impact sensitivity testing of the explosive pentaerythritol tetranitrate, *Ind. Eng. Chem. Res.*, **2021**, *60*, 5024-5033.
